# Supplementary material
Source: PubMed Central journal article supplement (PMC1895262)
Supplement: blood_2005-03-1189_1.pdf [file blood_2005-03-1189_1.pdf]

**Table S1. Groups of mice transplanted with either the MSCV- $\beta$ -gal-GFP vector or the MSCV-GFP vector (n=60).**

| <i>Groups</i>                               | <i>MSCV-<math>\beta</math>-gal-GFP</i> | <i>MSCV-GFP</i> |
|---------------------------------------------|----------------------------------------|-----------------|
| <i><math>\beta</math>-gal<sup>+/+</sup></i> | 5                                      | -               |
| <i><math>\beta</math>-gal<sup>-/-</sup></i> | 43                                     | 9               |
| <i>PPCA<sup>-/-</sup></i>                   | 3                                      | -               |
